# Supplementary material
Source: Springer Nature journal article supplement (https://www.springermedizin.de/resource/supplementary/12985_2011_1760_MOESM3_ESM.pdf/9611060)



**E276, E278**

**E307**

Supplement: MOESM3 [file 9611060]
